# Supplementary material
Source: publisher figshare collection journal article supplement (https://rs.figshare.com/ndownloader/files/23382476)
Supplement: Supplementary file 1 [file 23382476]

## Sheet: Sheet1
Taillardat et al. (in review)
Article code	Project site code	Authors	Year published	Country	Specific Location	Economy	Wetland type	Wetland type Refined	Coastal / Terrestrial	Latitude	Project Duration	Project area	Calculation Year	Costs in USD / ha (t)	Costs in USD / ha (@2010) CPI	Costs in USD / ha / yr (@2010) CPI
F1	F1a	Huang, J.C., Mitsch, W.J., Zhang, L., 2009. Ecological restoration design of a stream on a college campus in central Ohio 5, 329–340. doi:10.1016/j.ecoleng.2008.07.01	2009	USA	Marion, Ohio	Developed	Riparian wetland	Floodplain	Terrestrial	temperate	6	0.6	2004	108875	125690	20948.3			FLOODPLAIN (ALL AVERAGING)	20948.3	STDEV: NA because n = 1
M1	M1a	Adger NW, Kelly PM, Tri NH (1997) Valuing the products and services of mangrove restoration. Commonwealth Forestry Review 76:198-202	1997	Vietnam	Nam Ha Province	developing	Mangrove	Mangrove	Coastal	Tropical	1	1	1994	48	119.701	119.701
M1	M1b	Adger NW, Kelly PM, Tri NH (1997) Valuing the products and services of mangrove restoration. Commonwealth Forestry Review 76:198-202	1997	Vietnam	Nam Ha Province	developing	Mangrove	Mangrove	Coastal	Tropical	1	1	1994	55	137.157	137.157
M2	M2a	Brockmeyer R, Rey J, Virnstein R, Gilmore R, Earnest L (1997) Rehabilitation of impounded estuarine wetlands by hydrologic reconnection to the Indian River Lagoon, Florida (USA). Wetl Ecol Manag 4:93–109	1996	USA	Indian River Lagoon, Florida, USA	developed	Mangrove	Mangrove	Coastal	Tropical	3	8000	1995	225	321.967	107.323
M3	M3a	Brown B, Fadillah R, Nurdin Y, Soulsby I, Ahmad R (2014) CASE STUDY: Community Based Ecological Mangrove Rehabilitation (CBEMR) in Indonesia. Sapiens 7:1-12	2014	Indonesia	Tanakeke Island and Marus, South Sulawesi	developing	Mangrove	Mangrove	Coastal	Tropical	4	425	2013	1388	1187.24	296.809
M4	M4a	Hashim R, Kamali B, Tamin N, Zakaria R (2010) An integrated approach to coastal rehabilitation: Mangrove restoration in Sungai Haji Dorani, Malaysia. Estuar Coast Shelf Sci 86:118–124 AND Kamali B, Hashim R (2011) Mangrove restoration without planting. Ecol Eng 37:387–391	2010	Malaysia	Sungai Haji Dorani	developing	Mangrove	Mangrove	Coastal	Tropical	1	0.6	2008	61917	63343.2	63343.2
M5	M5a	Kamali B, Hashim R (2011) Mangrove restoration without planting. Ecol Eng 37:387–391	2011	Malaysia	Malaysia	developing	Mangrove	Mangrove	Coastal	Tropical	5	1819	2009	5223	5312.31	1062.46
M6	M6a	King D (1998) The dollar value of wetlands: trap set, bait taken, don’t swallow. Natl Wetl Newsl 20:7–11	1998	USA	USA	developed	Mangrove	Mangrove	Coastal	Tropical		0.404686	1997	59305	80563.5	80563.5
M7	M7a	Lewis III R, Hodgson A, Mauseth G (2005) Project facilitates the natural reseeding of mangrove forests (Florida). Ecol Restor 23:276–277	2005	USA	Tampa Bay, Florida	developed	Mangrove	Mangrove	Coastal	Tropical			1999	24000	31417.3	31417.3
M8	M8a	Milano G (1999) Restoration of coastal wetlands in southeastern Florida. Wetl J 11:15–24	1999	USA	Miami-Dade County, southeastern Florida	developed	Mangrove	Mangrove	Coastal	Tropical		121.5	1998	55144	73765.9	73765.9
M8	M8b	Milano G (1999) Restoration of coastal wetlands in southeastern Florida. Wetl J 11:15–24	1999	USA	North end of Key Biscayne, Florida	developed	Mangrove	Mangrove	Coastal	Tropical		8.70074	1996	91946	127825	127825
M8	M8c	Milano G (1999) Restoration of coastal wetlands in southeastern Florida. Wetl J 11:15–24	1999	USA	South end of Key Biscayne, Florida	developed	Mangrove	Mangrove	Coastal	Tropical		34.3983	1999	81399	106556	106556
M8	M8d	Milano G (1999) Restoration of coastal wetlands in southeastern Florida. Wetl J 11:15–24	1999	USA	North Miami, Florida	developed	Mangrove	Mangrove	Coastal	Tropical		0.809371	1995	172974	247520	247520
M8	M8e	Milano G (1999) Restoration of coastal wetlands in southeastern Florida. Wetl J 11:15–24	1999	USA	North Miami, Florida	developed	Mangrove	Mangrove	Coastal	Tropical		2.02343	1999	88958	116451	116451
M8	M8f	Milano G (1999) Restoration of coastal wetlands in southeastern Florida. Wetl J 11:15–24	1999	USA	Miami, Florida, USA	developed	Mangrove	Mangrove	Coastal	Tropical		5.26091	1990	57024	95167.3	95167.3
M8	M8g	Milano G (1999) Restoration of coastal wetlands in southeastern Florida. Wetl J 11:15–24	1999	USA	North side of the Oleta River, North Miami Beach, Florida	developed	Mangrove	Mangrove	Coastal	Tropical		18.2109	1999	82368	107824	107824
M8	M8h	Milano G (1999) Restoration of coastal wetlands in southeastern Florida. Wetl J 11:15–24	1999	USA	Chicken Key, located in the Biscayne Bay Aquatic Preserve, south Biscayne Bay, Miami-Dade, Florida	developed	Mangrove	Mangrove	Coastal	Tropical		2.8328	1997	211805	287729	287729
M9	M9a	Motamedi S, Hashim R, Zakaria R, Song KI, Sofawi B (2014) Long-term assessment of an innovative mangrove rehabilitation project: Case study on Carey Island, Malaysia. Sci World J 2014	2014	Malaysia	Carey Island	developing	Mangrove	Mangrove	Coastal	Tropical	4	0.192	2008	138122	141303	35325.8
M10	M10a	Primavera J, Esteban J (2008) A review of mangrove rehabilitation in the Philippines: successes, failures and future prospects. Wetl Ecol Manag 16:345–358	2008	Philippines	Philippines	developing	Mangrove	Mangrove	Coastal	Tropical			2007	100	117.104	117.104
M10	M10b	Primavera J, Esteban J (2008) A review of mangrove rehabilitation in the Philippines: successes, failures and future prospects. Wetl Ecol Manag 16:345–358	2008	Philippines	Philippines	developing	Mangrove	Mangrove	Coastal	Tropical			2007	500	585.52	585.52
M10	M10c	Primavera J, Esteban J (2008) A review of mangrove rehabilitation in the Philippines: successes, failures and future prospects. Wetl Ecol Manag 16:345–358	2008	Philippines	Philippines	developing	Mangrove	Mangrove	Coastal	Tropical	10	11486	1993	7783	19314.8	1931.48
M10	M10d	Primavera J, Esteban J (2008) A review of mangrove rehabilitation in the Philippines: successes, failures and future prospects. Wetl Ecol Manag 16:345–358	2008	Philippines	Philippines	developing	Mangrove	Mangrove	Coastal	Tropical	4	7000	1990	11429	39008	9751.99
M10	M10e	Primavera J, Esteban J (2008) A review of mangrove rehabilitation in the Philippines: successes, failures and future prospects. Wetl Ecol Manag 16:345–358	2008	Philippines	Philippines	developing	Mangrove	Mangrove	Coastal	Tropical	7	5302	1999	7167	11704.5	1672.08
M10	M10f	Primavera J, Esteban J (2008) A review of mangrove rehabilitation in the Philippines: successes, failures and future prospects. Wetl Ecol Manag 16:345–358	2008	Philippines	Magallanes in Agusan del Norte, Northern Mindanao	developing	Mangrove	Mangrove	Coastal	Tropical	1	53.8	2007	782	915.753	915.753
M10	M10g	Primavera J, Esteban J (2008) A review of mangrove rehabilitation in the Philippines: successes, failures and future prospects. Wetl Ecol Manag 16:345–358	2008	Philippines	various	developing	Mangrove	Mangrove	Coastal	Tropical			1990	337	1150.2	1150.2
M10	M10h	Primavera J, Esteban J (2008) A review of mangrove rehabilitation in the Philippines: successes, failures and future prospects. Wetl Ecol Manag 16:345–358	2008	Philippines	various	developing	Mangrove	Mangrove	Coastal	Tropical			1990	552	1884.01	1884.01
M10	M10i	Primavera J, Esteban J (2008) A review of mangrove rehabilitation in the Philippines: successes, failures and future prospects. Wetl Ecol Manag 16:345–358	2008	Philippines	various	developing	Mangrove	Mangrove	Coastal	Tropical			1990	228	778.18	778.18
M10	M10j	Primavera J, Esteban J (2008) A review of mangrove rehabilitation in the Philippines: successes, failures and future prospects. Wetl Ecol Manag 16:345–358	2008	Philippines	various	developing	Mangrove	Mangrove	Coastal	Tropical			1993	575	1426.96	1426.96
M10	M10k	Primavera J, Esteban J (2008) A review of mangrove rehabilitation in the Philippines: successes, failures and future prospects. Wetl Ecol Manag 16:345–358	2008	Philippines	Palawan	developing	Mangrove	Mangrove	Coastal	Tropical			1993	242	600.564	600.564
M10	M10l	Primavera J, Esteban J (2008) A review of mangrove rehabilitation in the Philippines: successes, failures and future prospects. Wetl Ecol Manag 16:345–358	2008	Philippines	Surigao del Sur	developing	Mangrove	Mangrove	Coastal	Tropical			2004	51	69.0506	69.0506
M10	M10m	Primavera J, Esteban J (2008) A review of mangrove rehabilitation in the Philippines: successes, failures and future prospects. Wetl Ecol Manag 16:345–358	2008	Philippines	New Buswang, Kalibo, Aklan	Developing	Mangrove	Mangrove	Coastal	Temperate			1989	462	1776.78	592.26
M10	M10n	Primavera J, Esteban J (2008) A review of mangrove rehabilitation in the Philippines: successes, failures and future prospects. Wetl Ecol Manag 16:345–358	2008	Philippines	Central Visayas	Developing	Mangrove	Mangrove	Coastal	Temperate			1984	3521	20965.8	2620.72
M10	M10o	Primavera J, Esteban J (2008) A review of mangrove rehabilitation in the Philippines: successes, failures and future prospects. Wetl Ecol Manag 16:345–358	2008	Philippines	Banacon	Developing	Mangrove	Mangrove	Coastal	Temperate			1983	78	698.251	698.251
M10	M10p	Primavera J, Esteban J (2008) A review of mangrove rehabilitation in the Philippines: successes, failures and future prospects. Wetl Ecol Manag 16:345–358	2008	Philippines	Banacon	Developing	Mangrove	Mangrove	Coastal	Temperate			1983	68	608.732	608.732
M10	M10q	Primavera J, Esteban J (2008) A review of mangrove rehabilitation in the Philippines: successes, failures and future prospects. Wetl Ecol Manag 16:345–358	2008	Philippines	Jolo	Developing	Mangrove	Mangrove	Coastal	Temperate			1983	125	1118.99	1118.99
M10	M10r	Primavera J, Esteban J (2008) A review of mangrove rehabilitation in the Philippines: successes, failures and future prospects. Wetl Ecol Manag 16:345–358	2008	Philippines	Central Visayas	Developing	Mangrove	Mangrove	Coastal	Temperate			1986	80	384.074	384.074
M10	M10s	Primavera J, Esteban J (2008) A review of mangrove rehabilitation in the Philippines: successes, failures and future prospects. Wetl Ecol Manag 16:345–358	2008	Philippines	Central Visayas	Developing	Mangrove	Mangrove	Coastal	Temperate			1986	40	192.037	192.037
M10	M10t	Primavera J, Esteban J (2008) A review of mangrove rehabilitation in the Philippines: successes, failures and future prospects. Wetl Ecol Manag 16:345–358	2008	Philippines	Central Visayas	Developing	Mangrove	Mangrove	Coastal	Temperate			1986	140	672.129	672.129
M11	M11a	Sathirathai S, Barbier E (2001) Valuing mangrove conservation in Southern Thailand. Contemp Econ Policy 19:109–122	2001	Thailand	Tha Po Village, Surat Thani	developing	Mangrove	Mangrove	Coastal	Tropical	1		2000	8240	10655.1	10655.1
M12	M12a	Spurgeon J (1999) The socio-economic costs and benefits of coastal habitat rehabilitation and creation. Mar Pollut Bull 37:373–382	1999	USA	USA	developed	Mangrove	Mangrove	Coastal	Tropical			1997	3000	4075.38	4075.38
M12	M12b	Spurgeon J (1999) The socio-economic costs and benefits of coastal habitat rehabilitation and creation. Mar Pollut Bull 37:373–382	1999	USA	USA	developed	Mangrove	Mangrove	Coastal	Tropical			1997	28500	40958.4	40958.4
M12	M12c	Spurgeon J (1999) The socio-economic costs and benefits of coastal habitat rehabilitation and creation. Mar Pollut Bull 37:373–382	1999	USA	USA	developed	Mangrove	Mangrove	Coastal	Tropical			1997	5700	8191.67	8191.67
M12	M12d	Spurgeon J (1999) The socio-economic costs and benefits of coastal habitat rehabilitation and creation. Mar Pollut Bull 37:373–382	1999	USA	USA	developed	Mangrove	Mangrove	Coastal	Tropical			1997	230000	330541	330541
M12	M12e	Spurgeon J (1999) The socio-economic costs and benefits of coastal habitat rehabilitation and creation. Mar Pollut Bull 37:373–382	1999	USA	USA	developed	Mangrove	Mangrove	Coastal	Tropical			1997	90000	122261	122261
M12	M12f	Spurgeon J (1999) The socio-economic costs and benefits of coastal habitat rehabilitation and creation. Mar Pollut Bull 37:373–382	1999	USA	USA	developed	Mangrove	Mangrove	Coastal	Tropical			1997	510000	692815	692815
M12	M12g	Spurgeon J (1999) The socio-economic costs and benefits of coastal habitat rehabilitation and creation. Mar Pollut Bull 37:373–382	1999	Puerto Rico	Puerto Rico	developed	Mangrove	Mangrove	Coastal	Tropical		400	1997	4000	4000	4000
M13	M13a	Tri NH, Adger WN, Kelly PM (1998) Natural resource management in mitigating climate impacts: the example of mangrove restoration in Vietnam. Glob Environ Change-Human Policy Dimens 8:49-61	1998	Vietnam	Nam Ha Province	developing	Mangrove	Mangrove	Coastal	Tropical	1	1	1994	55	137.157	137.157
M14	M14a	Tuan TH, My NHD, Anh LTQ, Toan NV (2014) Using contingent valuation method to estimate the WTP for mangrove restoration under the context of climate change: A case study of Thi Nai lagoon, Quy Nhon city, Vietnam. Ocean Coastal Manage 95:198-212	2014	Vietnam	Thi Nai Lagoon	developing	Mangrove	Mangrove	Coastal	Tropical	4	150	2013	5968	4324.47	1081.12
M15	M15a	Walton M, Samonte-Tan G, Primavera J, Edwards-Jones G, Vay L Le (2006) Are mangroves worth replanting? The direct economic benefits of a community-based reforestation project. Environ Conserv 33:335–343	2006	Philippines	at the mouth of the Aklan River, in the Aklan province of Western Visayas, Panay Island	developing	Mangrove	Mangrove	Coastal	Tropical			2003	213	302.315	302.315
M16	M16 a	Saenger P (1996) Mangrove restoration in Australia: a case study of Brisbane International Airport. In: Field C (ed) Restoration of mangrove ecosystems. International Tropical Timber Organization, International Society for Mangrove Ecosystems, Okinawa, Japan, p 36–51	1996	Australia	International Airport Brisbane	developed	Mangrove	Mangrove	Coastal	Temperate	1		1980	2277	8307.91	8307.91
M16	M16b	Saenger P (1996) Mangrove restoration in Australia: a case study of Brisbane International Airport. In: Field C (ed) Restoration of mangrove ecosystems. International Tropical Timber Organization, International Society for Mangrove Ecosystems, Okinawa, Japan, p 36–51	1996	Australia	International Airport Brisbane	developed	Mangrove	Mangrove	Coastal	Temperate	1		1980	3416	12463.7	12463.7
M16	M16c	Saenger P (1996) Mangrove restoration in Australia: a case study of Brisbane International Airport. In: Field C (ed) Restoration of mangrove ecosystems. International Tropical Timber Organization, International Society for Mangrove Ecosystems, Okinawa, Japan, p 36–51	1996	Australia	International Airport Brisbane	developed	Mangrove	Mangrove	Coastal	Temperate	1		1980	6263	22851.3	22851.3
M16	M16d	Saenger P (1996) Mangrove restoration in Australia: a case study of Brisbane International Airport. In: Field C (ed) Restoration of mangrove ecosystems. International Tropical Timber Organization, International Society for Mangrove Ecosystems, Okinawa, Japan, p 36–51	1996	Australia	International Airport Brisbane	developed	Mangrove	Mangrove	Coastal	Temperate	1		1980	20496	74782.1	74782.1
M16	M16e	Saenger P (1996) Mangrove restoration in Australia: a case study of Brisbane International Airport. In: Field C (ed) Restoration of mangrove ecosystems. International Tropical Timber Organization, International Society for Mangrove Ecosystems, Okinawa, Japan, p 36–51	1996	Australia	International Airport Brisbane	developed	Mangrove	Mangrove	Coastal	Temperate	1		1980	26189	95553.8	95553.8
M17	M17a	Teas H (1977) Ecology and restoration of mangrove shorelines in Florida. Environ Conserv 4:51–58	1977	USA	Florida	Developed	Mangrove	Mangrove	Coastal	Temperate			1976	10175	38982.2	38982.2
M17	M17b	Teas H (1977) Ecology and restoration of mangrove shorelines in Florida. Environ Conserv 4:51–58	1977	USA	Florida	Developed	Mangrove	Mangrove	Coastal	Temperate			1976	2470	9463.01	9463.01
M17	M17c	Teas H (1977) Ecology and restoration of mangrove shorelines in Florida. Environ Conserv 4:51–58	1977	USA	Florida	Developed	Mangrove	Mangrove	Coastal	Temperate			1976	1140	4367.54	4367.54			MANGROVE
M17	M17d	Teas H (1977) Ecology and restoration of mangrove shorelines in Florida. Environ Conserv 4:51–58	1977	USA	Florida	Developed	Mangrove	Mangrove	Coastal	Temperate			1976	22400	85818.4	85818.4			Mean	62770.7
M17	M17e	Teas H (1977) Ecology and restoration of mangrove shorelines in Florida. Environ Conserv 4:51–58	1977	USA	Florida	Developed	Mangrove	Mangrove	Coastal	Temperate			1976	5400	20688.4	20688.4			SD	147233
M17	M17f	Teas H (1977) Ecology and restoration of mangrove shorelines in Florida. Environ Conserv 4:51–58	1977	USA	Florida	Developed	Mangrove	Mangrove	Coastal	Temperate			1976	2510	9616.26	9616.26			Median	4367.54
M17	M17g	Teas H (1977) Ecology and restoration of mangrove shorelines in Florida. Environ Conserv 4:51–58	1977	USA	Florida	Developed	Mangrove	Mangrove	Coastal	Temperate			1976	216130	828033	828033
M18	M18a	Samson M, Rollon R (2008) Growth performance of planted mangroves in the Philippines: revisiting forest management strategies. Ambio 37:234–240	2008	Philippines	Philippines	Developing	Mangrove	Mangrove	Coastal	Temperate	20	44000	1988	400	1701.17	85.0586
FM1	FM1a	Gutrich, J.J., Hitzhusen, F.J., 2004. Assessing the substitutability of mitigation wetlands for natural sites : estimating restoration lag costs of wetland mitigation 48, 409–424. doi:10.1016/j.ecolecon.2003.10.019	2004	USA	Ohio	Developed	Freshwater marsh (lowland)	Marsh	Terrestrial	Temperate	1	0.607029	2000	143038	181127	181127
FM1	FM1b	Gutrich, J.J., Hitzhusen, F.J., 2004. Assessing the substitutability of mitigation wetlands for natural sites : estimating restoration lag costs of wetland mitigation 48, 409–424. doi:10.1016/j.ecolecon.2003.10.020	2004	USA	Ohio	Developed	Freshwater marsh (lowland)	Marsh	Terrestrial	Temperate	1	0.56656	2000	1.36907e+06	1.73363e+06	1.73363e+06
FM1	FM1c	Gutrich, J.J., Hitzhusen, F.J., 2004. Assessing the substitutability of mitigation wetlands for natural sites : estimating restoration lag costs of wetland mitigation 48, 409–424. doi:10.1016/j.ecolecon.2003.10.021	2004	USA	Ohio	Developed	Freshwater marsh (lowland)	Marsh	Terrestrial	Temperate	1	1.94249	2000	305947	387416	387416
FM1	FM1d	Gutrich, J.J., Hitzhusen, F.J., 2004. Assessing the substitutability of mitigation wetlands for natural sites : estimating restoration lag costs of wetland mitigation 48, 409–424. doi:10.1016/j.ecolecon.2003.10.022	2004	USA	Ohio	Developed	Freshwater marsh (lowland)	Marsh	Terrestrial	Temperate	1	6.87966	2000	151451	191780	191780
FM1	FM1e	Gutrich, J.J., Hitzhusen, F.J., 2004. Assessing the substitutability of mitigation wetlands for natural sites : estimating restoration lag costs of wetland mitigation 48, 409–424. doi:10.1016/j.ecolecon.2003.10.023	2004	USA	Ohio	Developed	Freshwater marsh (lowland)	Marsh	Terrestrial	Temperate	1	5.42279	2000	111014	140575	140575
FM1	FM1f	Gutrich, J.J., Hitzhusen, F.J., 2004. Assessing the substitutability of mitigation wetlands for natural sites : estimating restoration lag costs of wetland mitigation 48, 409–424. doi:10.1016/j.ecolecon.2003.10.024	2004	USA	Ohio	Developed	Freshwater marsh (lowland)	Marsh	Terrestrial	Temperate	1	4.20873	2000	66017	83596.5	83596.5
FM1	FM1g	Gutrich, J.J., Hitzhusen, F.J., 2004. Assessing the substitutability of mitigation wetlands for natural sites : estimating restoration lag costs of wetland mitigation 48, 409–424. doi:10.1016/j.ecolecon.2003.10.025	2004	USA	Ohio	Developed	Freshwater marsh (lowland)	Marsh	Terrestrial	Temperate	1	7.28435	2000	11125.1	14087.6	14087.6
FM1	FM1h	Gutrich, J.J., Hitzhusen, F.J., 2004. Assessing the substitutability of mitigation wetlands for natural sites : estimating restoration lag costs of wetland mitigation 48, 409–424. doi:10.1016/j.ecolecon.2003.10.026	2004	USA	Ohio	Developed	Freshwater marsh (lowland)	Marsh	Terrestrial	Temperate	1	25.4952	2000	35361.2	44777.5	44777.5
FM1	FM1i	Gutrich, J.J., Hitzhusen, F.J., 2004. Assessing the substitutability of mitigation wetlands for natural sites : estimating restoration lag costs of wetland mitigation 48, 409–424. doi:10.1016/j.ecolecon.2003.10.027	2004	USA	Colorado	Developed	Freshwater marsh (highland)	Marsh	Terrestrial	Temperate	1	0.809372	2000	70585.6	89381.7	89381.7
FM2	FM2a	Zentner, J., Glaspy, J., Schenk, D., 2003. Wetland and Riparian Woodland Restoration Costs will this wetland P ro ject C o sts S alt M arsh R esto ratio n 166–173.	2003	USA	San Fransisco	Developed	Wet meadow	Marsh	Terrestrial	Temperate	1	0.4	2002	40000	48490.7	48490.7			MARSH
FM2	FM2b	Zentner, J., Glaspy, J., Schenk, D., 2003. Wetland and Riparian Woodland Restoration Costs will this wetland P ro ject C o sts S alt M arsh R esto ratio n 166–173.	2003	USA	San Fransisco	Developed	Perrenial marsh	Marsh	Terrestrial	Temperate	1	0.4	2002	58750	71220.8	71220.8			Mean	199413
FM3	FM3a	Strehlow, T., Dekeyser, S., Kobiela, B., 2019. Estimating Restoration Costs in Southeastern North Dakota 35, 23–32.	2017	USA	Albert Ekre Grassland Preserve in Richland County, North Dakota	Developed	Wet meadow	Marsh	Terrestrial	Temperate	2	1	2013	1909	1786.88	893.442			SD	436958
FM3	FM3b	Strehlow, T., Dekeyser, S., Kobiela, B., 2019. Estimating Restoration Costs in Southeastern North Dakota 35, 23–32.	2017	USA	Albert Ekre Grassland Preserve in Richland County, North Dakota	Developed	Wet meadow	Marsh	Terrestrial	Temperate	2	1	2013	2228	2085.48	1042.74			Median	71220.8
FM3	FM3c	Strehlow, T., Dekeyser, S., Kobiela, B., 2019. Estimating Restoration Costs in Southeastern North Dakota 35, 23–32.	2017	USA	Albert Ekre Grassland Preserve in Richland County, North Dakota	Developed	Wet meadow	Marsh	Terrestrial	Temperate	2	1	2013	5072	4747.55	2373.78
FM4	FM4a	Jenkins, W.A., Murray, B.C., Kramer, R.A., Faulkner, S.P., 2010. Valuing ecosystem services from wetlands restoration in the Mississippi Alluvial Valley. Ecol. Econ. 69, 1051–1061. doi:10.1016/j.ecolecon.2009.11.022	2010	USA	Mississippi	Developed	Wet meadow	Marsh	Terrestrial	Temperate	1	1	2009	790	802.96	802.96
P1	P1a	Grand-clement, E., Anderson, K., Smith, D., Angus, M., Luscombe, D.J., Gatis, N., Bray, L.S., Brazier, R.E., 2015. New approaches to the restoration of shallow marginal peatlands. J. Environ. Manage. 161, 417–430. doi:10.1016/j.jenvman.2015.06.023	2015	UK	Exmoor National Park (Exmoor)	Developed	Shallow peatland	Peatland	Terrestrial	Temperate	1	390	2012	774.034	735.131	735.131
P1	P1b	Grand-clement, E., Anderson, K., Smith, D., Angus, M., Luscombe, D.J., Gatis, N., Bray, L.S., Brazier, R.E., 2015. New approaches to the restoration of shallow marginal peatlands. J. Environ. Manage. 161, 417–430. doi:10.1016/j.jenvman.2015.06.024	2015	UK	Exmoor National Park (Aclands)	Developed	Shallow peatland	Peatland	Terrestrial	Temperate	1	18	2014	1334.48	1229.17	1229.17			PEATLAND
P1	P1c	Grand-clement, E., Anderson, K., Smith, D., Angus, M., Luscombe, D.J., Gatis, N., Bray, L.S., Brazier, R.E., 2015. New approaches to the restoration of shallow marginal peatlands. J. Environ. Manage. 161, 417–430. doi:10.1016/j.jenvman.2015.06.025	2015	UK	Exmoor National Park (Spooners)	Developed	Shallow peatland	Peatland	Terrestrial	Temperate	1	45	2014	778.307	716.891	716.891			Mean	6668.73
P1	P1d	Grand-clement, E., Anderson, K., Smith, D., Angus, M., Luscombe, D.J., Gatis, N., Bray, L.S., Brazier, R.E., 2015. New approaches to the restoration of shallow marginal peatlands. J. Environ. Manage. 161, 417–430. doi:10.1016/j.jenvman.2015.06.026	2015	UK	Exmoor National Park (Exmoor)	Developed	Shallow peatland	Peatland	Terrestrial	Temperate	1	824	2014	503.513	463.781	463.781			SD	14652.7
P2	P2a	Klimkowska, A., Dzierz, P., Brzezin, K., Kotowski, W., Medrzycki, M., 2010. Can we balance the high costs of nature restoration with the method of topsoil removal ? Case study from Poland 18, 202–205. doi:10.1016/j.jnc.2009.09.003	2010	Poland	Calowanie Fen	Developed	Fen	Peatland	Terrestrial	Temperate	1	0.27	2004	31607.8	37173.4	37173.4			Median	1229.17
P3	P3a	Grossmann, M., Dietrich, O., 2012. Social Benefits And Abatement Costs Of Greenhouse Gas Emission Reductions From Restoring Drained Fen Wetlands : A Case Study From The Elbe River Basin. Irrigation and Drainage. DOI: 10.1002/ird.1669.	2012	Germany	Elbe River Basin	Developed	Fen	Peatland	Terrestrial	Temperate	1	1	2012	4131.42	3967.75	3967.75
P4	P4a	Worrall, F., Evans, M.G., Bonn, A., Reed, M.S., Chapman, D., Holden, J., 2009. Science of the Total Environment Can carbon offsetting pay for upland ecological restoration ? Sci. Total Environ. 408, 26–36. doi:10.1016/j.scitotenv.2009.09.022	2009	UK	Peak District	Developed	Peatland	Peatland	Terrestrial	Temperate	1	550	2009	2336.74	2394.99	2394.99
SM1	SM1a	Zentner, J., Glaspy, J., Schenk, D., 2003. Wetland and Riparian Woodland Restoration Costs will this wetland P ro ject C o sts S alt M arsh R esto ratio n 166–173.	2003	USA	San Fransisco	Developed	Salt marsh	Salt marsh	Terrestrial	Temperate	1	4	2002	14750	17881	17881
SM2	SM2a	Kassakian J., Jones A., Martinich J., Hudgens D. Managing for No Net Loss of Ecological Services: An Approach for Quantifying Loss of Coastal Wetlands due to Sea Level Rise. Environmental Management 59, 736–751.	2017	USA	Delaware Bay (Delaware)	Developed	Estuary, Marsh, Riverine	Salt marsh	Coastal	Temperate	1	18351	2016	527006	478805	478805
SM3	SM3a	Bauer D, Cyr N, Swallow S (2004) Public Preferences for Compensatory Mitigation of Salt Marsh Losses: a Contingent Choice of Alternatives. Conserv Biol 18:401–411	2004	USA	Rhode Island	developed	Saltmarsh	Salt marsh	Coastal	Temperate		42	2003	78571	93134.3	93134.3
SM4	SM4a	Brockmeyer R, Rey J, Virnstein R, Gilmore R, Earnest L (1997) Rehabilitation of impounded estuarine wetlands by hydrologic reconnection to the Indian River Lagoon, Florida (USA). Wetl Ecol Manag 4:93–109	1996	USA	Indian River Lagoon, Florida, USA	developed	Saltmarsh	Salt marsh	Coastal	Temperate	3	8000	1995	225	321.967	107.323
SM5	SM5a	Burchett MD, Allen C, Pulkownik A, MacFarlane G (1998) Rehabilitation of saline wetland, Olympics 2000 site, Sydney (Australia) - II: Saltmarsh transplantation trials and application. Mar Pollut Bull 37:526-534	1998	Australia	Haslams Creek, Olympics 2000 Site, Sydney	developed	Saltmarsh	Salt marsh	Coastal	Temperate	2.5	2.5	1997	148436	213323	85329.1
SM6	SM6a	Burdick DM, Dionne M, Boumans RM, Short FT (1997) Ecological responses to tidal restorations of two northern New England salt marshes. Wetl Ecol Manag 4:129-144	1997	USA	Mill Brook Marsh, New Hampshire	developed	Saltmarsh	Salt marsh	Coastal	Temperate	3	4.5	1996	17778	24715.3	8238.42
SM7	SM7a	King D (1998) The dollar value of wetlands: trap set, bait taken, don’t swallow. Natl Wetl Newsl 20:7–11	1998	USA		developed	Saltmarsh	Salt marsh	Coastal	Temperate		0.404686	1997	122500	166411	166411
SM8	SM8a	Milano G (1999) Restoration of coastal wetlands in southeastern Florida. Wetl J 11:15–24	1999	USA	Miami-Dade County, southeastern Florida	developed	Saltmarsh	Salt marsh	Coastal	Temperate		121.5	1998	55144	73765.9	73765.9
SM8	SM8b	Milano G (1999) Restoration of coastal wetlands in southeastern Florida. Wetl J 11:15–24	1999	USA	North end of Key Biscayne, Florida	developed	Saltmarsh	Salt marsh	Coastal	Temperate		8.70074	1996	91954	127836	127836
SM8	SM8c	Milano G (1999) Restoration of coastal wetlands in southeastern Florida. Wetl J 11:15–24	1999	USA	South end of Key Biscayne, Florida	developed	Saltmarsh	Salt marsh	Coastal	Temperate		34.3983	1999	81395	106550	106550
SM8	SM8d	Milano G (1999) Restoration of coastal wetlands in southeastern Florida. Wetl J 11:15–24	1999	USA	North Miami, Florida	developed	Saltmarsh	Salt marsh	Coastal	Temperate		2.02343	1999	90000	117815	117815
SM8	SM8e	Milano G (1999) Restoration of coastal wetlands in southeastern Florida. Wetl J 11:15–24	1999	USA	Highland Oaks Park, Florida	developed	Saltmarsh	Salt marsh	Coastal	Temperate		5.26091	1999	49057	64218.2	64218.2
SM8	SM8f	Milano G (1999) Restoration of coastal wetlands in southeastern Florida. Wetl J 11:15–24	1999	USA	Chicken Key, located in the Biscayne Bay Aquatic Preserve, south Biscayne Bay, Miami-Dade, Florida	developed	Saltmarsh	Salt marsh	Coastal	Temperate		2.8328	1997	214286	291099	291099
SM9	SM9a	Minello T, Rozas L, Caldwell P, Liese C (2012) A comparison of salt marsh construction costs with the value of exported shrimp production. Wetlands 32:791–799	2012	USA	GISP Terraces, Galveston Bay, Texas	developed	Saltmarsh	Salt marsh	Coastal	Temperate	1	11.3	2007	58425	61443.7	61443.7
SM9	SM9b	Minello T, Rozas L, Caldwell P, Liese C (2012) A comparison of salt marsh construction costs with the value of exported shrimp production. Wetlands 32:791–799	2012	USA	Pierce Marsh I, Galveston Bay, Texas	developed	Saltmarsh	Salt marsh	Coastal	Temperate		5.1	2007	75464	79363.1	79363.1
SM9	SM9c	Minello T, Rozas L, Caldwell P, Liese C (2012) A comparison of salt marsh construction costs with the value of exported shrimp production. Wetlands 32:791–799	2012	USA	Mason Marsh, Galveston Bay, Texas	developed	Saltmarsh	Salt marsh	Coastal	Temperate		1.9	2007	52811	55539.7	55539.7
SM9	SM9d	Minello T, Rozas L, Caldwell P, Liese C (2012) A comparison of salt marsh construction costs with the value of exported shrimp production. Wetlands 32:791–799	2012	USA	Minello Marsh, Galveston Bay, Texas	developed	Saltmarsh	Salt marsh	Coastal	Temperate		1.1	2007	63830	67128	67128
SM9	SM9e	Minello T, Rozas L, Caldwell P, Liese C (2012) A comparison of salt marsh construction costs with the value of exported shrimp production. Wetlands 32:791–799	2012	USA	Pierce Marsh II, Galveston Bay, Texas	developed	Saltmarsh	Salt marsh	Coastal	Temperate		3	2007	60883	64028.7	64028.7
SM9	SM9f	Minello T, Rozas L, Caldwell P, Liese C (2012) A comparison of salt marsh construction costs with the value of exported shrimp production. Wetlands 32:791–799	2012	USA	Jumbile Cove I, Galveston Bay, Texas	developed	Saltmarsh	Salt marsh	Coastal	Temperate		4.6	2007	60989	64140.2	64140.2
SM9	SM9g	Minello T, Rozas L, Caldwell P, Liese C (2012) A comparison of salt marsh construction costs with the value of exported shrimp production. Wetlands 32:791–799	2012	USA	Jumbile Cove II, Galveston Bay, Texas	developed	Saltmarsh	Salt marsh	Coastal	Temperate		9.9	2007	31623	33256.9	33256.9
SM9	SM9h	Minello T, Rozas L, Caldwell P, Liese C (2012) A comparison of salt marsh construction costs with the value of exported shrimp production. Wetlands 32:791–799	2012	USA	Delehide Cove, Galveston Bay, Texas	developed	Saltmarsh	Salt marsh	Coastal	Temperate		3.7	2007	125641	132133	132133
SM9	SM9i	Minello T, Rozas L, Caldwell P, Liese C (2012) A comparison of salt marsh construction costs with the value of exported shrimp production. Wetlands 32:791–799	2012	USA	I-45 West, Galveston Bay, Texas	developed	Saltmarsh	Salt marsh	Coastal	Temperate		5.7	2007	85255	89660	89660
SM10	SM10a	Rozas L, Caldwell P, Minello T (2005) The fishery value of salt marsh restoration projects. J Coast Res:37–50	2005	USA	I-45 East, Galveston Bay, Texas	developed	Saltmarsh	Salt marsh	Coastal	Temperate		1.8	2001	41222	50764.4	50764.4
SM11	SM11a	Sparks E, Cebrian J, Biber P, Sheehan K, Tobias C (2013) Cost-effectiveness of two small-scale salt marsh restoration designs. Ecol Eng 53:250–256	2013	USA	Grand Bay National Estuarine Research Reserve, Mississippi	developed	Saltmarsh	Salt marsh	Coastal	Temperate	2.1	0.000492	2006	4735772	5122539	2439305
SM11	SM11b	Sparks E, Cebrian J, Biber P, Sheehan K, Tobias C (2013) Cost-effectiveness of two small-scale salt marsh restoration designs. Ecol Eng 53:250–257	2013	USA	Grand Bay National Estuarine Research Reserve, Mississippi	developed	Saltmarsh	Salt marsh	Coastal	Temperate	2.1	0.000462	2006	4145022	4483543	2135020
SM11	SM11c	Sparks E, Cebrian J, Biber P, Sheehan K, Tobias C (2013) Cost-effectiveness of two small-scale salt marsh restoration designs. Ecol Eng 53:250–258	2013	USA	Grand Bay National Estuarine Research Reserve, Mississippi	developed	Saltmarsh	Salt marsh	Coastal	Temperate	2.1	0.000492	2006	3658537	3957327	1884441
SM11	SM11d	Sparks E, Cebrian J, Biber P, Sheehan K, Tobias C (2013) Cost-effectiveness of two small-scale salt marsh restoration designs. Ecol Eng 53:250–259	2013	USA	Grand Bay National Estuarine Research Reserve, Mississippi	developed	Saltmarsh	Salt marsh	Coastal	Temperate	2.1	0.000462	2006	3571429	3863105	1839574
SM11	SM11e	Sparks E, Cebrian J, Biber P, Sheehan K, Tobias C (2013) Cost-effectiveness of two small-scale salt marsh restoration designs. Ecol Eng 53:250–260	2013	USA	Grand Bay National Estuarine Research Reserve, Mississippi	developed	Saltmarsh	Salt marsh	Coastal	Temperate	2.1	0.000492	2006	4126016	4462985	2125231
SM11	SM11f	Sparks E, Cebrian J, Biber P, Sheehan K, Tobias C (2013) Cost-effectiveness of two small-scale salt marsh restoration designs. Ecol Eng 53:250–261	2013	USA	Grand Bay National Estuarine Research Reserve, Mississippi	developed	Saltmarsh	Salt marsh	Coastal	Temperate	2.1	0.000462	2006	3820346	4132351	1967786
SM11	SM11g	Sparks E, Cebrian J, Biber P, Sheehan K, Tobias C (2013) Cost-effectiveness of two small-scale salt marsh restoration designs. Ecol Eng 53:250–262	2013	USA	Grand Bay National Estuarine Research Reserve, Mississippi	developed	Saltmarsh	Salt marsh	Coastal	Temperate	2.1	0.000492	2006	3048780	3297772	1570368
SM11	SM11h	Sparks E, Cebrian J, Biber P, Sheehan K, Tobias C (2013) Cost-effectiveness of two small-scale salt marsh restoration designs. Ecol Eng 53:250–263	2013	USA	Grand Bay National Estuarine Research Reserve, Mississippi	developed	Saltmarsh	Salt marsh	Coastal	Temperate	2.1	0.000462	2006	3246753	3511913	1672340
SM11	SM11i	Sparks E, Cebrian J, Biber P, Sheehan K, Tobias C (2013) Cost-effectiveness of two small-scale salt marsh restoration designs. Ecol Eng 53:250–264	2013	USA	Grand Bay National Estuarine Research Reserve, Mississippi	developed	Saltmarsh	Salt marsh	Coastal	Temperate	2.1	0.000492	2006	1686992	1824767	868937
SM11	SM11j	Sparks E, Cebrian J, Biber P, Sheehan K, Tobias C (2013) Cost-effectiveness of two small-scale salt marsh restoration designs. Ecol Eng 53:250–265	2013	USA	Grand Bay National Estuarine Research Reserve, Mississippi	developed	Saltmarsh	Salt marsh	Coastal	Temperate	2.1	0.000462	2006	898268	971629	462680
SM11	SM11k	Sparks E, Cebrian J, Biber P, Sheehan K, Tobias C (2013) Cost-effectiveness of two small-scale salt marsh restoration designs. Ecol Eng 53:250–266	2013	USA	Grand Bay National Estuarine Research Reserve, Mississippi	developed	Saltmarsh	Salt marsh	Coastal	Temperate	2.1	0.000492	2006	609756	659554	314074
SM11	SM11l	Sparks E, Cebrian J, Biber P, Sheehan K, Tobias C (2013) Cost-effectiveness of two small-scale salt marsh restoration designs. Ecol Eng 53:250–267	2013	USA	Grand Bay National Estuarine Research Reserve, Mississippi	developed	Saltmarsh	Salt marsh	Coastal	Temperate	2.1	0.000462	2006	324675	351191	167234
SM11	SM11m	Sparks E, Cebrian J, Biber P, Sheehan K, Tobias C (2013) Cost-effectiveness of two small-scale salt marsh restoration designs. Ecol Eng 53:250–268	2013	USA	Grand Bay National Estuarine Research Reserve, Mississippi	developed	Saltmarsh	Salt marsh	Coastal	Temperate	2.1	0.000492	2006	1077236	1165213	554863
SM11	SM11n	Sparks E, Cebrian J, Biber P, Sheehan K, Tobias C (2013) Cost-effectiveness of two small-scale salt marsh restoration designs. Ecol Eng 53:250–269	2013	USA	Grand Bay National Estuarine Research Reserve, Mississippi	developed	Saltmarsh	Salt marsh	Coastal	Temperate	2.1	0.000462	2006	573593	620438	295447
SM12	SM12a	Spurgeon J (1999) The socio-economic costs and benefits of coastal habitat rehabilitation and creation. Mar Pollut Bull 37:373–382	1999	USA		developed	Saltmarsh	Salt marsh	Coastal	Temperate			1997	9000	12226.1	12226.1
SM12	SM12b	Spurgeon J (1999) The socio-economic costs and benefits of coastal habitat rehabilitation and creation. Mar Pollut Bull 37:373–383	1999	USA		developed	Saltmarsh	Salt marsh	Coastal	Temperate			1997	46000	62489.2	62489.2
SM12	SM12c	Spurgeon J (1999) The socio-economic costs and benefits of coastal habitat rehabilitation and creation. Mar Pollut Bull 37:373–384	1999	USA		developed	Saltmarsh	Salt marsh	Coastal	Temperate			1997	600	815.076	815.076
SM12	SM12d	Spurgeon J (1999) The socio-economic costs and benefits of coastal habitat rehabilitation and creation. Mar Pollut Bull 37:373–385	1999	USA		developed	Saltmarsh	Salt marsh	Coastal	Temperate			1997	80000	108677	108677
SM12	SM12e	Spurgeon J (1999) The socio-economic costs and benefits of coastal habitat rehabilitation and creation. Mar Pollut Bull 37:373–388	1999	USA	Galilee Bird Sanctuary, Rhode Island	developed	Saltmarsh	Salt marsh	Coastal	Temperate		14	1997	100000	135846	135846
SM12	SM12f	Spurgeon J (1999) The socio-economic costs and benefits of coastal habitat rehabilitation and creation. Mar Pollut Bull 37:373–389	1999	USA	Greenhill Marsh, Louisiana	developed	Saltmarsh	Salt marsh	Coastal	Temperate		44.5	1997	157303	213690	213690
SM12	SM12g	Spurgeon J (1999) The socio-economic costs and benefits of coastal habitat rehabilitation and creation. Mar Pollut Bull 37:373–390	1999	UK	Northey Island, Essex	developed	Saltmarsh	Salt marsh	Coastal	Temperate		1	1997	43000	54886.7	54886.7
SM12	SM12h	Spurgeon J (1999) The socio-economic costs and benefits of coastal habitat rehabilitation and creation. Mar Pollut Bull 37:373–391	1999	UK	Horsey Island, Essex	developed	Saltmarsh	Salt marsh	Coastal	Temperate		2	1997	1860	2374.17	2374.17
SM12	SM12i	Spurgeon J (1999) The socio-economic costs and benefits of coastal habitat rehabilitation and creation. Mar Pollut Bull 37:373–392	1999	UK	Orplands, Essex	developed	Saltmarsh	Salt marsh	Coastal	Temperate		40	1997	2600	3318.73	3318.73			SALTMARSH
SM13	SM13a	Taylor DS (2012) Removing the sands (sins?) of our past: dredge spoil removal and saltmarsh restoration along the Indian River Lagoon, Florida (USA). Wetl Ecol Manag 20:213-218	2012	USA	Sams Creek, Indian River Lagoon, Florida	developed	Saltmarsh	Salt marsh	Coastal	Temperate	1	25	2003	27274	32329.3	32329.3			Mean	419403
SM14	SM14a	Broome SW, Seneca ED, Woodhouse Jr WW (1988) Tidal salt marsh restoration. Aquat Bot 32:1-22	1988	USA	North Carolina	developed	Saltmarsh	Salt marsh	Coastal	Temperate	1		1987	15400	29534.3	29534.3			SD	695271
SM14	SM14b	Broome SW, Seneca ED, Woodhouse Jr WW (1988) Tidal salt marsh restoration. Aquat Bot 32:1-22	1988	USA	North Carolina	developed	Saltmarsh	Salt marsh	Coastal	Temperate	1		1987	3200	6137.01	6137.01			Median	89660
SM14	SM14c	Broome SW, Seneca ED, Woodhouse Jr WW (1988) Tidal salt marsh restoration. Aquat Bot 32:1-22	1988	USA	North Carolina	developed	Saltmarsh	Salt marsh	Coastal	Temperate	1		1987	18800	36054.9	36054.9
SM14	SM14d	Broome SW, Seneca ED, Woodhouse Jr WW (1988) Tidal salt marsh restoration. Aquat Bot 32:1-22	1988	USA	North Carolina	developed	Saltmarsh	Salt marsh	Coastal	Temperate	1		1987	34000	65205.7	65205.7
